# Supplementary material for: Lineage 1 Porcine Reproductive and Respiratory Syndrome Virus Attenuated Live Vaccine Provides Broad Cross-Protection against Homologous and Heterologous NADC30-Like Virus Challenge in Piglets
Source: Vaccines (Basel). 2022 May 10;10(5):752. doi: 10.3390/vaccines10050752 (PMC9146329; doi:10.3390/vaccines10050752)
Supplement: Supplementary file 1 [file vaccines-10-00752-s001.zip › vaccines-1679929-supplementary.pdf]

# Supplementary Materials

**Table S1 Nucleotide and amino acid changes in 16 different mutant passages.**

| NSP   | Position | SD | Mutation at indication no. of passages |                 |                 |                  |                  |                  |                  |                  |                  |                   |                   |                   |                   |                   |                   |
|-------|----------|----|----------------------------------------|-----------------|-----------------|------------------|------------------|------------------|------------------|------------------|------------------|-------------------|-------------------|-------------------|-------------------|-------------------|-------------------|
|       |          |    | 5 <sup>th</sup>                        | 6 <sup>th</sup> | 8 <sup>th</sup> | 10 <sup>th</sup> | 20 <sup>th</sup> | 30 <sup>th</sup> | 40 <sup>th</sup> | 60 <sup>th</sup> | 80 <sup>th</sup> | 100 <sup>th</sup> | 105 <sup>th</sup> | 110 <sup>th</sup> | 125 <sup>th</sup> | 135 <sup>th</sup> | 150 <sup>th</sup> |
| 5'UTR | 29       | C  | C                                      | C               | C               | C                | C                | C                | C                | C                | T                | T                 | T                 | T                 | T                 | T                 | T                 |
|       | 36       | C  | C                                      | C               | C               | C                | C                | C                | C                | T                | T                | T                 | T                 | T                 | T                 | T                 | T                 |
| NSP1α | 504      | C  | C                                      | C               | C               | C                | C                | C                | C                | C                | C                | C                 | T                 | T                 | T                 | T                 | T                 |
| NSP1β | 229      | T  | T                                      | T               | T               | T                | T                | T                | T                | T                | C                | C                 | C                 | C                 | C                 | C                 | C                 |
| NSP2  | 21       | A  | A                                      | A               | A               | A                | A                | A                | A                | A                | A                | A                 | A                 | A                 | G                 | G                 | G                 |
|       | 63       | C  | C                                      | C               | C               | C                | C                | C                | C                | T                | T                | T                 | T                 | T                 | T                 | T                 | T                 |
|       | 565      | G  | G                                      | G               | G               | G                | G                | G                | A                | A                | A                | A                 | A                 | A                 | A                 | A                 | A                 |
|       | 567      | G  | G                                      | G               | G               | G                | G                | G                | G                | T                | T                | T                 | T                 | T                 | T                 | T                 | T                 |
|       | 621      | T  | T                                      | T               | C               | C                | C                | C                | C                | C                | C                | C                 | C                 | C                 | C                 | C                 | C                 |
|       | 901      | C  | C                                      | C               | C               | C                | C                | C                | A                | A                | A                | A                 | A                 | A                 | A                 | A                 | A                 |
|       | 1134     | C  | C                                      | C               | C               | C                | C                | C                | T                | T                | T                | T                 | T                 | T                 | T                 | T                 | T                 |
|       | 1357     | G  | G                                      | G               | G               | G                | A                | A                | A                | A                | A                | A                 | A                 | A                 | A                 | A                 | A                 |
|       | 1546     | G  | G                                      | G               | G               | G                | G                | G                | C                | C                | C                | C                 | C                 | C                 | C                 | C                 | C                 |
|       | 2000     | C  | C                                      | C               | C               | C                | C                | C                | C                | T                | T                | T                 | T                 | T                 | T                 | T                 | T                 |
|       | 2184     | T  | T                                      | T               | T               | T                | T                | T                | T                | T                | C                | C                 | C                 | C                 | C                 | C                 | C                 |
|       | 2257     | T  | T                                      | T               | T               | T                | T                | T                | T                | T                | C                | C                 | C                 | C                 | C                 | C                 | C                 |
|       | 2439     | A  | A                                      | A               | A               | A                | A                | A                | A                | A                | G                | G                 | G                 | G                 | G                 | G                 | G                 |
|       | 2634     | A  | A                                      | A               | A               | A                | G                | G                | G                | G                | G                | G                 | G                 | G                 | G                 | G                 | G                 |
|       | 2817     | C  | C                                      | C               | C               | C                | C                | C                | C                | A                | A                | A                 | A                 | A                 | A                 | A                 | A                 |
|       | 3117     | C  | C                                      | C               | C               | C                | C                | C                | C                | T                | T                | T                 | T                 | T                 | T                 | T                 | T                 |
| NSP3  | 254      | T  | T                                      | T               | T               | T                | T                | T                | C                | C                | C                | C                 | C                 | C                 | C                 | C                 | C                 |
| NSP4  | 257      | G  | G                                      | G               | G               | A                | A                | A                | A                | A                | A                | A                 | A                 | A                 | A                 | A                 | A                 |
| NSP5  | 309      | C  | C                                      | C               | C               | T                | T                | T                | T                | T                | T                | T                 | T                 | T                 | T                 | T                 | T                 |
|       | 261      | A  | A                                      | A               | A               | T                | T                | T                | T                | T                | T                | T                 | T                 | T                 | T                 | T                 | T                 |
| NSP7α | 293      | T  | T                                      | T               | T               | T                | T                | T                | T                | C                | C                | C                 | C                 | C                 | C                 | C                 | C                 |
|       | 492      | C  | C                                      | C               | T               | T                | T                | T                | T                | T                | T                | T                 | T                 | T                 | T                 | T                 | T                 |
| NSP9  | 192      | C  | C                                      | C               | C               | C                | C                | C                | T                | T                | T                | T                 | T                 | T                 | T                 | T                 | T                 |
|       | 240      | C  | C                                      | T               | T               | T                | T                | T                | T                | T                | T                | T                 | T                 | T                 | T                 | T                 | T                 |
| NSP10 | 69       | G  | G                                      | G               | G               | G                | A                | A                | A                | A                | A                | A                 | A                 | A                 | A                 | A                 | A                 |
|       | 361      | G  | G                                      | G               | G               | A                | A                | A                | A                | A                | A                | A                 | A                 | A                 | A                 | A                 | A                 |
| NSP11 | 468      | G  | G                                      | G               | G               | A                | A                | A                | A                | A                | A                | A                 | A                 | A                 | A                 | A                 | A                 |
|       | 1194     | T  | T                                      | T               | T               | C                | C                | C                | C                | C                | C                | C                 | C                 | C                 | C                 | C                 | C                 |
| NSP12 | 1312     | T  | T                                      | T               | T               | C                | C                | C                | C                | C                | C                | C                 | C                 | C                 | C                 | C                 | C                 |
|       | 1419     | A  | A                                      | A               | A               | G                | G                | G                | G                | G                | G                | G                 | G                 | G                 | G                 | G                 | G                 |
| NSP13 | 1626     | A  | A                                      | A               | A               | A                | A                | A                | A                | T                | T                | T                 | T                 | T                 | T                 | T                 | T                 |
|       | 87       | C  | C                                      | C               | C               | T                | T                | T                | T                | T                | T                | T                 | T                 | T                 | T                 | T                 | T                 |
| NSP14 | 294      | C  | C                                      | C               | C               | T                | T                | T                | T                | T                | T                | T                 | T                 | T                 | T                 | T                 | T                 |
|       | 577      | G  | G                                      | G               | G               | A                | A                | A                | A                | A                | A                | A                 | A                 | A                 | A                 | A                 | A                 |
| NSP15 | 867      | A  | A                                      | A               | A               | A                | A                | A                | A                | G                | G                | G                 | G                 | G                 | G                 | G                 | G                 |
|       | 234      | T  | T                                      | T               | T               | T                | T                | T                | T                | T                | T                | C                 | C                 | C                 | C                 | C                 | C                 |
| NSP16 | 651      | A  | A                                      | A               | A               | G                | G                | G                | G                | G                | G                | G                 | G                 | G                 | G                 | G                 | G                 |
|       | 76       | T  | T                                      | T               | T               | T                | T                | T                | T                | C                | C                | C                 | C                 | C                 | C                 | C                 | C                 |
| NSP17 | 174      | C  | C                                      | C               | C               | C                | C                | C                | C                | T                | T                | T                 | T                 | T                 | T                 | T                 | T                 |
|       | 373      | A  | A                                      | A               | A               | A                | G                | G                | G                | G                | G                | G                 | G                 | G                 | G                 | G                 | G                 |
| ORF2a | 146      | A  | A                                      | A               | A               | A                | A                | A                | A                | A                | A                | C                 | C                 | C                 | C                 | C                 | C                 |
|       | 289      | A  | A                                      | A               | G               | G                | G                | G                | G                | G                | G                | G                 | G                 | G                 | G                 | G                 | G                 |
| ORF2b | 292      | T  | T                                      | T               | C               | C                | C                | C                | C                | C                | C                | C                 | C                 | C                 | C                 | C                 | C                 |
|       | 345      | G  | G                                      | G               | G               | G                | G                | G                | G                | A                | A                | A                 | A                 | A                 | A                 | A                 | A                 |
| ORF3  | 507      | A  | A                                      | A               | A               | A                | A                | A                | A                | A                | G                | G                 | G                 | G                 | G                 | G                 | G                 |
|       | 705      | T  | T                                      | T               | T               | T                | T                | T                | T                | T                | C                | C                 | C                 | C                 | C                 | C                 | C                 |
| ORF4  | 740      | C  | C                                      | C               | C               | C                | T                | T                | T                | T                | T                | T                 | T                 | T                 | T                 | T                 | T                 |
|       | 141      | A  | A                                      | A               | A               | A                | A                | A                | A                | A                | A                | C                 | C                 | C                 | C                 | C                 | C                 |
| ORF5  | 82       | T  | T                                      | T               | T               | T                | T                | T                | T                | T                | C                | C                 | C                 | C                 | C                 | C                 | C                 |
|       | 117      | C  | C                                      | C               | C               | C                | T                | T                | T                | T                | T                | T                 | T                 | T                 | T                 | T                 | T                 |
| ORF6  | 164      | C  | C                                      | C               | C               | C                | C                | C                | C                | T                | T                | T                 | T                 | T                 | T                 | T                 | T                 |
|       | 272      | G  | G                                      | G               | G               | G                | G                | G                | G                | G                | G                | A                 | A                 | A                 | A                 | A                 | A                 |
| ORF7  | 286      | C  | C                                      | C               | C               | C                | C                | C                | C                | C                | T                | T                 | T                 | T                 | T                 | T                 | T                 |
|       | 340      | T  | T                                      | T               | A               | A                | A                | A                | A                | A                | A                | A                 | A                 | A                 | A                 | A                 | A                 |
| ORF8  | 370      | A  | A                                      | A               | A               | A                | G                | G                | G                | G                | G                | G                 | G                 | G                 | G                 | G                 | G                 |
|       | 479      | A  | A                                      | A               | A               | A                | A                | A                | A                | C                | C                | C                 | C                 | C                 | C                 | C                 | C                 |
| ORF9  | 7        | A  | A                                      | A               | A               | A                | A                | A                | A                | G                | G                | G                 | G                 | G                 | G                 | G                 | G                 |
|       | 174      | C  | C                                      | C               | C               | A                | A                | A                | A                | A                | A                | A                 | A                 | A                 | A                 | A                 | A                 |
| ORF10 | 271      | G  | G                                      | G               | G               | G                | G                | G                | G                | G                | A                | A                 | A                 | A                 | A                 | A                 | A                 |
|       | 330      | T  | T                                      | T               | T               | T                | T                | T                | T                | C                | C                | C                 | C                 | C                 | C                 | C                 | C                 |
| ORF11 | 55       | T  | T                                      | T               | T               | C                | C                | C                | C                | C                | C                | C                 | C                 | C                 | C                 | C                 | C                 |
|       | 217      | C  | C                                      | C               | C               | C                | C                | C                | C                | C                | T                | T                 | T                 | T                 | T                 | T                 | T                 |
| ORF12 | 396      | A  | A                                      | A               | A               | A                | A                | A                | A                | G                | G                | G                 | G                 | G                 | G                 | G                 | G                 |
|       | 21       | G  | G                                      | G               | G               | A                | A                | A                | A                | A                | A                | A                 | A                 | A                 | A                 | A                 | A                 |
| ORF13 | 76       | T  | T                                      | T               | T               | C                | C                | C                | C                | C                | C                | C                 | C                 | C                 | C                 | C                 | C                 |
|       | 82       | A  | A                                      | A               | A               | A                | A                | A                | A                | G                | G                | G                 | G                 | G                 | G                 | G                 | G                 |
| ORF14 | 171      | A  | A                                      | A               | A               | A                | A                | A                | A                | A                | A                | G                 | G                 | G                 | G                 | G                 | G                 |
|       | 177      | T  | T                                      | T               | T               | T                | T                | T                | T                | C                | C                | C                 | C                 | C                 | C                 | C                 | C                 |
| ORF15 | 363      | C  | C                                      | C               | C               | C                | C                | C                | C                | C                | C                | T                 | T                 | T                 | T                 | T                 | T                 |
|       | 22       | T  | T                                      | T               | T               | T                | T                | T                | T                | T                | T                | C                 | C                 | C                 | C                 | C                 | C                 |
| 3'UTR | 69       | T  | T                                      | T               | T               | C                | C                | C                | C                | C                | C                | C                 | C                 | C                 | C                 | C                 | C                 |
| NSP1β | 77       | Y  | Y                                      | Y               | Y               | Y                | Y                | Y                | Y                | Y                | H                | H                 | H                 | H                 | H                 | H                 | H                 |
| NSP2  | 301      | Q  | Q                                      | Q               | Q               | Q                | Q                | Q                | Q                | K                | K                | K                 | K                 | K                 | K                 | K                 | K                 |

|       |      |   |   |   |   |   |   |   |   |   |   |   |   |   |   |   |
|-------|------|---|---|---|---|---|---|---|---|---|---|---|---|---|---|---|
| NSP3  | 453  | A | A | A | A | A | T | T | T | T | T | T | T | T | T | T |
|       | 516  | G | G | G | G | G | G | G | R | R | R | R | R | R | R | R |
|       | 667  | A | A | A | A | A | A | A | A | V | V | V | V | V | V | V |
|       | 1020 | C | C | C | C | C | C | C | A | C | S | S | S | S | S | S |
|       | 85   | V | V | V | V | V | V | V | A | A | A | A | A | A | A | A |
| NSP4  | 86   | G | G | G | G | E | E | E | E | A | A | A | A | A | A | A |
| NSP5  | 98   | V | V | V | V | V | V | V | V | A | A | A | A | A | A | A |
| NSP9  | 121  | V | V | V | V | I | I | I | I | I | I | I | I | I | I | I |
| NSP10 | 193  | A | A | A | A | T | T | T | T | T | T | T | T | T | T | T |
| NSP11 | 60   | Y | Y | Y | Y | Y | Y | Y | Y | Y | Y | C | C | C | C | C |
| NSP12 | 188  | T | T | T | T | T | T | T | T | T | T | C | T | C | A | E |
|       | 125  | K | K | K | K | K | E | E | E | E | E | A | E | A | E | E |
| GP2a  | 49   | Y | Y | Y | Y | Y | Y | Y | Y | Y | Y | S | S | S | S | S |
|       | 97   | M | M | M | M | V | V | V | V | V | V | V | V | V | V | V |
|       | 98   | F | F | F | F | L | L | L | L | L | L | L | L | L | L | L |
|       | 115  | M | M | M | M | M | M | M | M | I | I | I | I | I | I | I |
| GP3   | 247  | S | S | S | S | S | L | L | L | L | L | L | L | L | L | L |
|       | 28   | S | S | S | S | S | S | S | S | S | S | P | P | P | P | P |
|       | 55   | P | P | P | P | P | P | P | P | L | L | L | L | L | L | L |
| GP4   | 91   | G | G | G | G | G | G | G | G | G | G | E | E | E | E | E |
|       | 96   | P | P | P | P | P | P | P | P | P | S | S | S | S | S | S |
| ORF5a | 114  | F | F | F | F | I | I | I | I | I | I | I | I | I | I | I |
|       | 124  | I | I | I | I | I | V | V | V | V | V | V | V | V | V | V |
| GP5   | 160  | E | E | E | E | E | E | E | A | A | A | A | A | A | A | A |
|       | 3    | R | R | R | R | R | R | R | R | G | G | G | G | G | G | G |
|       | 58   | N | N | N | N | N | K | K | K | K | K | K | K | K | K | K |
| M     | 91   | G | G | G | G | G | G | G | G | G | S | S | S | S | S | S |
|       | 73   | L | L | L | L | L | L | L | L | L | F | F | F | F | F | F |
| N     | 28   | K | K | K | K | K | K | K | E | E | E | E | E | E | E | E |

**Table S2 Comparison of protective effect of different vaccine strains or candidate vaccine strain against NADC30-like PRRSVs.**

| Vaccine strains or candidate vaccine strain | The days post-vaccination (before virus challenge) (dpv) | NADC30-like PRRSV strain | The days post-challenge (dpc) | Evaluation parameters and grouping         |                                                 |                                                                | Reference |
|---------------------------------------------|----------------------------------------------------------|--------------------------|-------------------------------|--------------------------------------------|-------------------------------------------------|----------------------------------------------------------------|-----------|
|                                             |                                                          |                          |                               | Parameters of evaluation                   | Challenge group                                 | Immunized group                                                |           |
| Ingelvac PRRS® MLV                          | 28                                                       | TJnh1501                 | 21                            | Clinical symptoms                          | Obvious clinical symptoms                       | Could not alleviate the clinical signs                         | [52]      |
|                                             |                                                          |                          |                               | Days of fever                              | 12 (>40.0°C)                                    | 3 (>40.0°C)                                                    |           |
|                                             |                                                          |                          |                               | Average daily gain                         | Significantly lower than negative control group | Significantly lower than negative control group                |           |
|                                             |                                                          |                          |                               | Pathological and histopathological lesions | Moderate histopathological lesions              | Could not reduce lung gross and microscopic lesions            |           |
| JXA1-R                                      | 28                                                       | TJnh1501                 | 21                            | Viremia                                    | High viremia                                    | Significantly reduced at some point in time.                   |           |
|                                             |                                                          |                          |                               | Clinical symptoms                          | Obvious clinical symptoms                       | Could not alleviate the clinical signs                         |           |
|                                             |                                                          |                          |                               | Days of fever                              | 12 (>40.0°C)                                    | 9 (>40.0°C)                                                    |           |
|                                             |                                                          |                          |                               | Average daily gain                         | Significantly lower than negative control group | Significantly lower than negative control group                |           |
| Commercial vaccine 1 and 3                  | 28                                                       | HNjz15                   | 14                            | Pathological and histopathological lesions | Moderate histopathological lesions              | Could not reduce lung gross and microscopic lesions            | [51]      |
|                                             |                                                          |                          |                               | Viremia                                    | High viremia                                    | Significantly reduced at some point in time.                   |           |
|                                             |                                                          |                          |                               | Clinical symptoms                          | PRRSV-specific clinical symptoms (5/5)          | Could not alleviate the clinical signs                         |           |
|                                             |                                                          |                          |                               | Days of fever                              | 4 ( $\geq$ 40.0°C)                              | 1~2 ( $\geq$ 40.0°C)                                           |           |
| Commercial vaccine 2, 4 and 5               | 28                                                       | HNjz15                   | 14                            | Average daily gain                         | Significantly lower than negative control group | Significantly lower than negative control group                |           |
|                                             |                                                          |                          |                               | Pathological and histopathological lesions | Typical pathological lesions                    | The lesions were reduced but not significant.                  |           |
|                                             |                                                          |                          |                               | Viremia                                    | High viremia                                    | Significantly reduced                                          |           |
|                                             |                                                          |                          |                               | Clinical symptoms                          | PRRSV-specific clinical symptoms (5/5)          | PRRSV-specific clinical symptoms (2~3/5)                       |           |
| TJM-F92                                     | 28                                                       | HN201605                 | 21                            | Days of fever                              | 4 ( $\geq$ 40.0°C)                              | 1~2 ( $\geq$ 40.0°C)                                           | [43]      |
|                                             |                                                          |                          |                               | Average daily gain                         | Significantly lower than negative control group | Significantly lower than negative control group                |           |
|                                             |                                                          |                          |                               | Pathological and histopathological lesions | Typical pathological lesions                    | The lesions were reduced but not significant.                  |           |
|                                             |                                                          |                          |                               | Viremia                                    | High viremia                                    | No significant reduction                                       |           |
| TJM-F92                                     | 28                                                       | HN201605                 | 21                            | Clinical symptoms                          | Mild clinical symptoms                          | No clinical symptoms                                           |           |
|                                             |                                                          |                          |                               | Days of fever                              | 7 (>40°C)                                       | No fever                                                       |           |
|                                             |                                                          |                          |                               | Average daily gain                         | Significantly lower than negative control group | No significant difference compared with negative control group |           |
|                                             |                                                          |                          |                               | Pathological and histopathological lesions | Fewer pathological changes                      | No visible gross pathological changes                          |           |

|                                 |    |                |    | Viremia                                    | High viremia                                    | No viremia                                        |      |
|---------------------------------|----|----------------|----|--------------------------------------------|-------------------------------------------------|---------------------------------------------------|------|
|                                 |    |                |    | Clinical symptoms                          | Severe clinical symptoms                        | /                                                 |      |
|                                 |    |                |    | Days of fever                              | 10 ( $\geq 40.0^{\circ}\text{C}$ )              | No fever                                          |      |
|                                 |    |                |    | Average daily gain                         | /                                               | /                                                 |      |
| TJM-F92                         | 28 | FJ1402         | 14 | Pathological and histopathological lesions | Severe pathological damage                      | Mild pathological damage                          |      |
|                                 |    |                |    | Viremia                                    | High viremia                                    | Significantly reduced at some point in time.      | [53] |
|                                 |    |                |    | Clinical symptoms                          | Severe clinical symptoms                        | /                                                 |      |
|                                 |    |                |    | Days of fever                              | 10 ( $\geq 40.0^{\circ}\text{C}$ )              | 7 ( $\geq 40.0^{\circ}\text{C}$ )                 |      |
|                                 |    |                |    | Average daily gain                         | /                                               | /                                                 |      |
| R98                             | 28 | FJ1402         | 14 | Pathological and histopathological lesions | Severe pathological damage                      | Mild pathological damage                          |      |
|                                 |    |                |    | Viremia                                    | High viremia                                    | Significantly reduced at some point in time.      |      |
|                                 |    |                |    | Clinical symptoms                          | Severe clinical symptoms                        | Could not alleviate the clinical signs            |      |
|                                 |    |                |    | Days of fever                              | 7 ( $>40^{\circ}\text{C}$ )                     | 3 ( $>40^{\circ}\text{C}$ )                       |      |
|                                 |    |                |    | Average daily gain                         | Significantly lower than negative control group | Significantly lower than negative control group   |      |
| Ingelvac PRRS MLV               | 28 | CHsx1401       | 21 | Pathological and histopathological lesions | Moderate histopathological lesions              | Could not reduce lung pathological lesions        |      |
|                                 |    |                |    | Viremia                                    | High viremia                                    | Partially efficacious in the reduction of viremia |      |
|                                 |    |                |    | Clinical symptoms                          | Severe clinical symptoms                        | Could not alleviate the clinical signs            | [37] |
|                                 |    |                |    | Days of fever                              | 7 ( $>40^{\circ}\text{C}$ )                     | 10 ( $>40^{\circ}\text{C}$ )                      |      |
|                                 |    |                |    | Average daily gain                         | Significantly lower than negative control group | Significantly lower than negative control group   |      |
| JXA1-R                          | 28 | CHsx1401       | 21 | Pathological and histopathological lesions | Moderate histopathological lesions              | Could not reduce lung pathological lesions        |      |
|                                 |    |                |    | Viremia                                    | High viremia                                    | Partially efficacious in the reduction of viremia |      |
|                                 |    |                |    | Clinical symptoms                          | Severe clinical symptoms                        | Significantly decreased                           |      |
|                                 |    |                |    | Days of fever                              | 11 ( $>41^{\circ}\text{C}$ )                    | 11 ( $>41^{\circ}\text{C}$ )                      |      |
|                                 |    |                |    | Average daily gain                         | Significantly lower than negative control group | Significantly lower than negative control group   |      |
| Ruilanan <sup>®</sup> (TJM-F92) | 28 | v2016/ZJ/09-03 | 15 | Pathological and histopathological lesions | Typical pathological lesions                    | Significantly reduced.                            |      |
|                                 |    |                |    | Viremia                                    | High viremia                                    | No significant reduction                          | [64] |
|                                 |    |                |    | Clinical symptoms                          | Severe clinical symptoms                        | Significantly decreased                           |      |
|                                 |    |                |    | Days of fever                              | 11 ( $>41^{\circ}\text{C}$ )                    | 7 ( $>41^{\circ}\text{C}$ )                       |      |
|                                 |    |                |    | Average daily gain                         | Significantly lower than negative control group | Significantly lower than negative control group   |      |
| Ingelvac PRRS <sup>®</sup> MLV  | 28 | v2016/ZJ/09-03 | 15 | Pathological and histopathological lesions | Typical pathological lesions                    | The lesions were significantly reduced.           |      |

|                    |    |                |    |                                            |                                                 |                                                                |            |
|--------------------|----|----------------|----|--------------------------------------------|-------------------------------------------------|----------------------------------------------------------------|------------|
|                    |    |                |    | Viremia                                    | High viremia                                    | Significantly reduced at some point in time.                   |            |
| Ingelvac PRRS® MLV | 28 | FJZ03          | 14 | Clinical symptoms                          | Typical symptoms of PRRS                        | No clinical symptoms                                           | [44]       |
|                    |    |                |    | Days of fever                              | 10 (>40°C)                                      | 4 (>40°C)                                                      |            |
|                    |    |                |    | Average daily gain                         | Significantly lower than negative control group | Lower than negative control group but not significantly        |            |
|                    |    |                |    | Pathological and histopathological lesions | Severe pathological lesions                     | Mild lung lesions                                              |            |
| Ingelvac PRRS® MLV | 28 | FJWQ16         | 14 | Viremia                                    | High viremia                                    | Significantly reduced at some point in time.                   |            |
|                    |    |                |    | Clinical symptoms                          | Typical symptoms of PRRS                        | Severe clinical signs                                          |            |
|                    |    |                |    | Days of fever                              | Fever days 10 (>40°C)                           | Fever days 9 (>40°C)                                           |            |
|                    |    |                |    | Average daily gain                         | Significantly lower than negative control group | Significantly lower than negative control group                |            |
|                    |    |                |    | Pathological and histopathological lesions | Severe pathological lesions                     | Mild lung lesions                                              |            |
|                    |    |                |    | Viremia                                    | High viremia                                    | Significantly reduced at some point in time.                   |            |
| Ingelvac PRRS® MLV | 42 | v2016/ZJ/09-03 | 14 | Clinical symptoms                          | Severe clinical symptoms                        | Mild cough                                                     | [47]       |
|                    |    |                |    | Days of fever                              | 10~15 (>40°C)                                   | 2~12 (>40°C)                                                   |            |
|                    |    |                |    | Average daily gain                         | Significantly lower than negative control group | Significantly lower than negative control group                |            |
|                    |    |                |    | Pathological and histopathological lesions | Severe pathological damage                      | Mild to moderate interstitial pneumonia                        |            |
|                    |    |                |    | Viremia                                    | High viremia                                    | Significantly reduced                                          |            |
| SD-R               | 28 | SD             | 21 | Clinical symptoms                          | Severe clinical symptoms                        | No clinical symptoms                                           | This study |
|                    |    |                |    | Days of fever                              | 6~13 (≥40.5°C)                                  | No fever                                                       |            |
|                    |    |                |    | Average daily gain                         | Significantly lower than negative control group | No significant difference compared with negative control group |            |
|                    |    |                |    | Pathological and histopathological lesions | Severe pathological damage                      | No obvious pathological damage                                 |            |
| SD-R               | 28 | HLJWK108-1711  | 21 | Viremia                                    | High viremia                                    | Significantly reduced                                          |            |
|                    |    |                |    | Clinical symptoms                          | Severe clinical symptoms                        | No clinical symptoms                                           |            |
|                    |    |                |    | Days of fever                              | 5~10 (≥40.5°C)                                  | No fever                                                       |            |
|                    |    |                |    | Average daily gain                         | Significantly lower than negative control group | No significant difference compared with negative control group |            |
|                    |    |                |    | Pathological and histopathological lesions | Severe pathological damage                      | No obvious pathological damage                                 |            |
|                    |    |                |    | Viremia                                    | High viremia                                    | Significantly reduced                                          |            |
